# Supplementary material for: Bone marrow mesenchymal stem cells tune the differentiation of myeloid-derived suppressor cells in bleomycin-induced lung injury
Source: PubMed Central journal article supplement (PMC6158827; doi:10.1186/s13287-018-0983-1), 2018-09-26
Supplement: 13287_2018_983_MOESM1_ESM.pdf [file 13287_2018_983_MOESM1_ESM.pdf]

Additional file 1: Figure S1

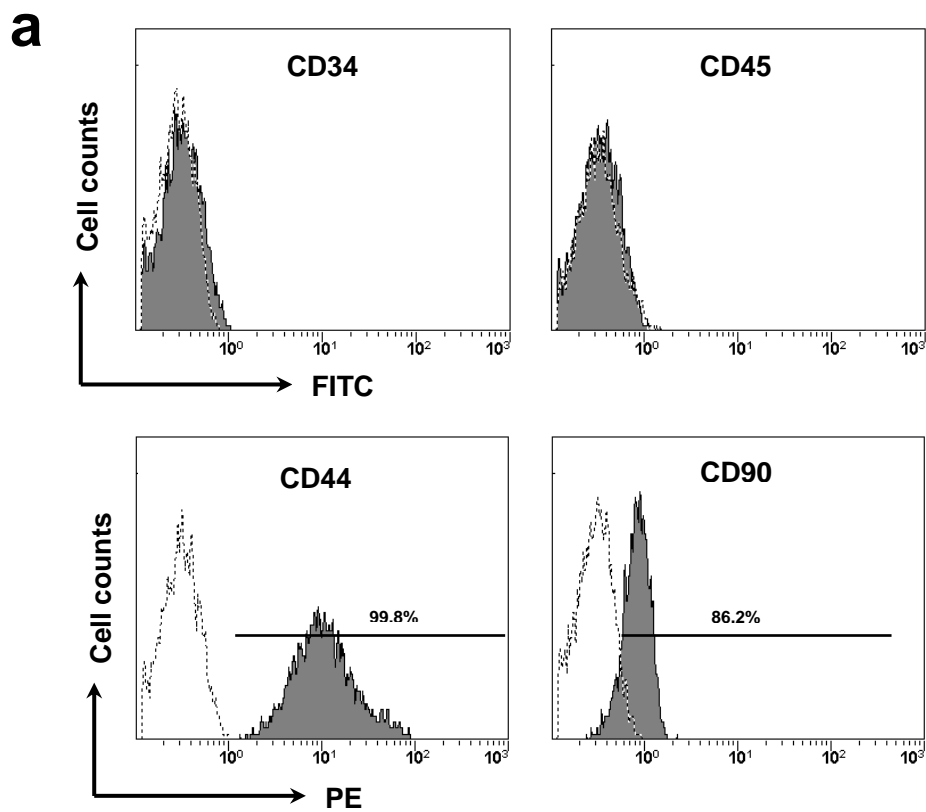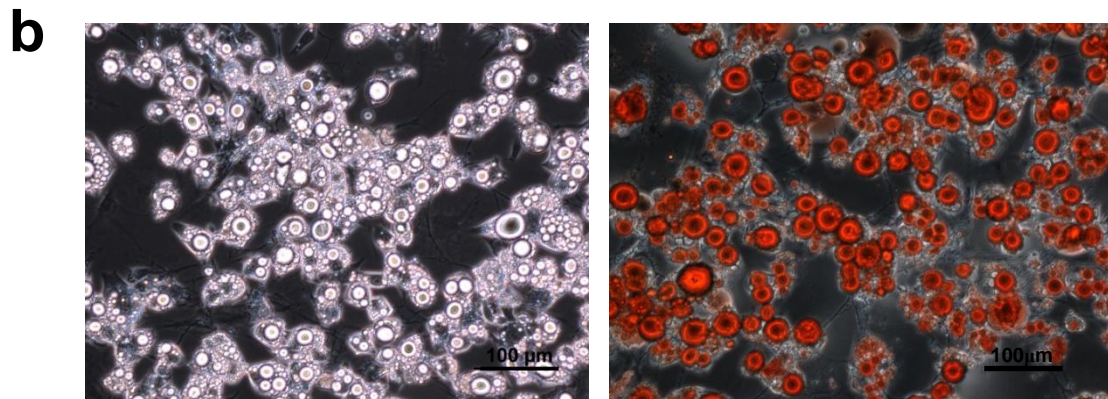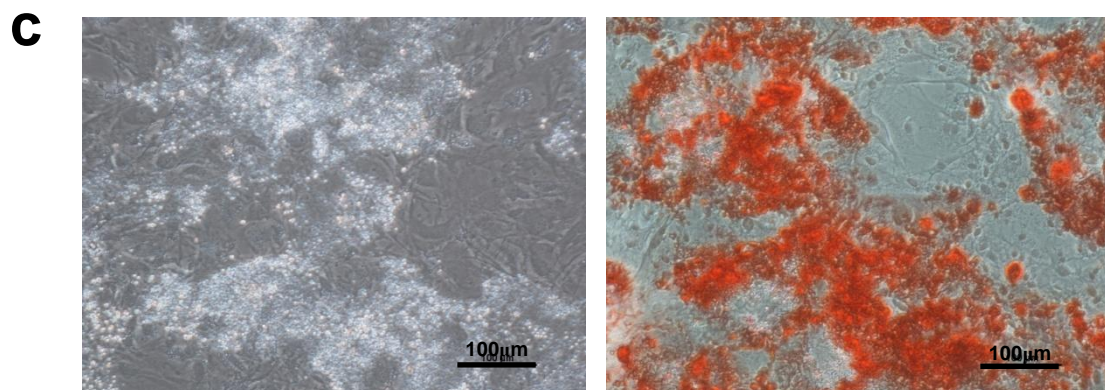

**Additional file 1: Figure S1. Characterization of mouse BMSC. a** Flow cytometric analysis of BMSC. Dash line: fluorescent-conjugated isotype mAb. Solid line: fluorescent-conjugated anti-CD34, CD44, CD45 and CD90 mAb. **b** Oil droplet formation in the differentiated adipocytes was observed by light

**microscopy (left) and demonstrated by oil red O staining (right). c Calcium deposition in the differentiated osteocytes was observed by light microscopy (left) and showed by alizarin red staining (right).**
