# Supplementary material for: Bone marrow mesenchymal stem cells tune the differentiation of myeloid-derived suppressor cells in bleomycin-induced lung injury
Source: PubMed Central journal article supplement (PMC6158827; doi:10.1186/s13287-018-0983-1), 2018-09-26
Supplement: 13287_2018_983_MOESM2_ESM.pdf [file 13287_2018_983_MOESM2_ESM.pdf]

Additional file 2: Figure S2

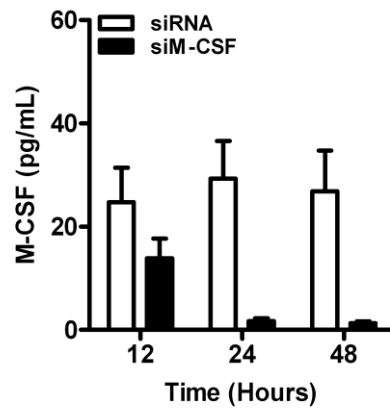

**Additional file 2: Figure S2. Knockdown of M-CSF expression in mouse BMSC. BMSC transfected with either control siRNA or siM-CSF ( $1 \times 10^4$  cells/well) were cultured in vitro. The concentration of M-CSF was measured in the supernatant of each well using ELISA at indicated time point.**
