# Supplementary material for: Bone marrow mesenchymal stem cells tune the differentiation of myeloid-derived suppressor cells in bleomycin-induced lung injury
Source: PubMed Central journal article supplement (PMC6158827; doi:10.1186/s13287-018-0983-1), 2018-09-26
Supplement: 13287_2018_983_MOESM4_ESM.pdf [file 13287_2018_983_MOESM4_ESM.pdf]

Additional file 4: Figure S4

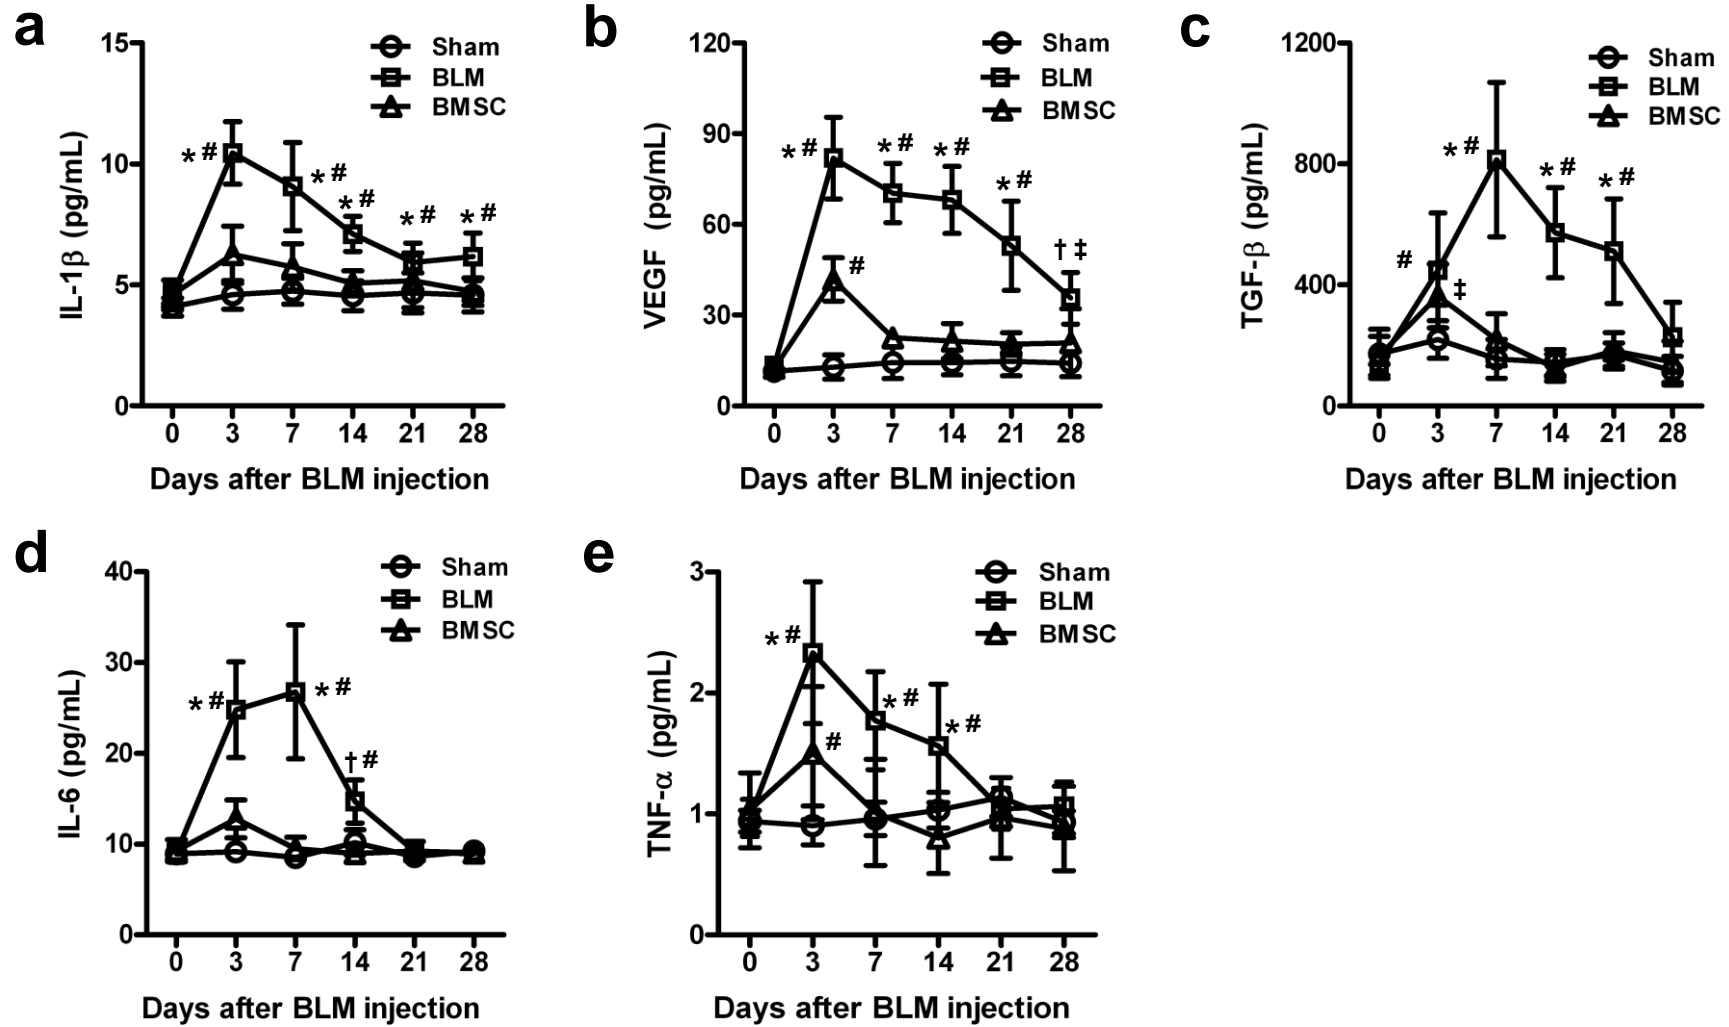

**Additional file 4: Figure S4.** BMSC reduces the levels of IL-1 $\beta$ , VEGF, TGF- $\beta$ , IL-6, and TNF- $\alpha$  in bronchoalveolar lavage (BAL) fluid. **After BMSC treatment in BLM-induced lung injury mouse, BAL was flushed from the Sham-, BLM- and BMSC-treated mice (3 mice per group).** The levels of (a) IL-1 $\beta$ , (b) VEGF, (c) TGF- $\beta$ , (d) IL-6 and (e) TNF- $\alpha$  were measured by ELISA **using triplicate samples. Data presented are representative of two replicated experiments.** \*P < 0.01 and † P < 0.05 as compared with “BMSC” group; # P < 0.01 and ‡ P < 0.05 as compared with “Sham” group. BLM, bleomycin; BMSC, bone marrow mesenchymal stem cells; IL: interleukin; TNF- $\alpha$ , tumor necrosis factor- $\alpha$ ; TGF- $\beta$ , transforming growth factor- $\beta$ ; VEGF, vascular epithelial growth factor.
