# Supplementary material for: Bone marrow mesenchymal stem cells tune the differentiation of myeloid-derived suppressor cells in bleomycin-induced lung injury
Source: PubMed Central journal article supplement (PMC6158827; doi:10.1186/s13287-018-0983-1), 2018-09-26
Supplement: 13287_2018_983_MOESM5_ESM.pdf [file 13287_2018_983_MOESM5_ESM.pdf]

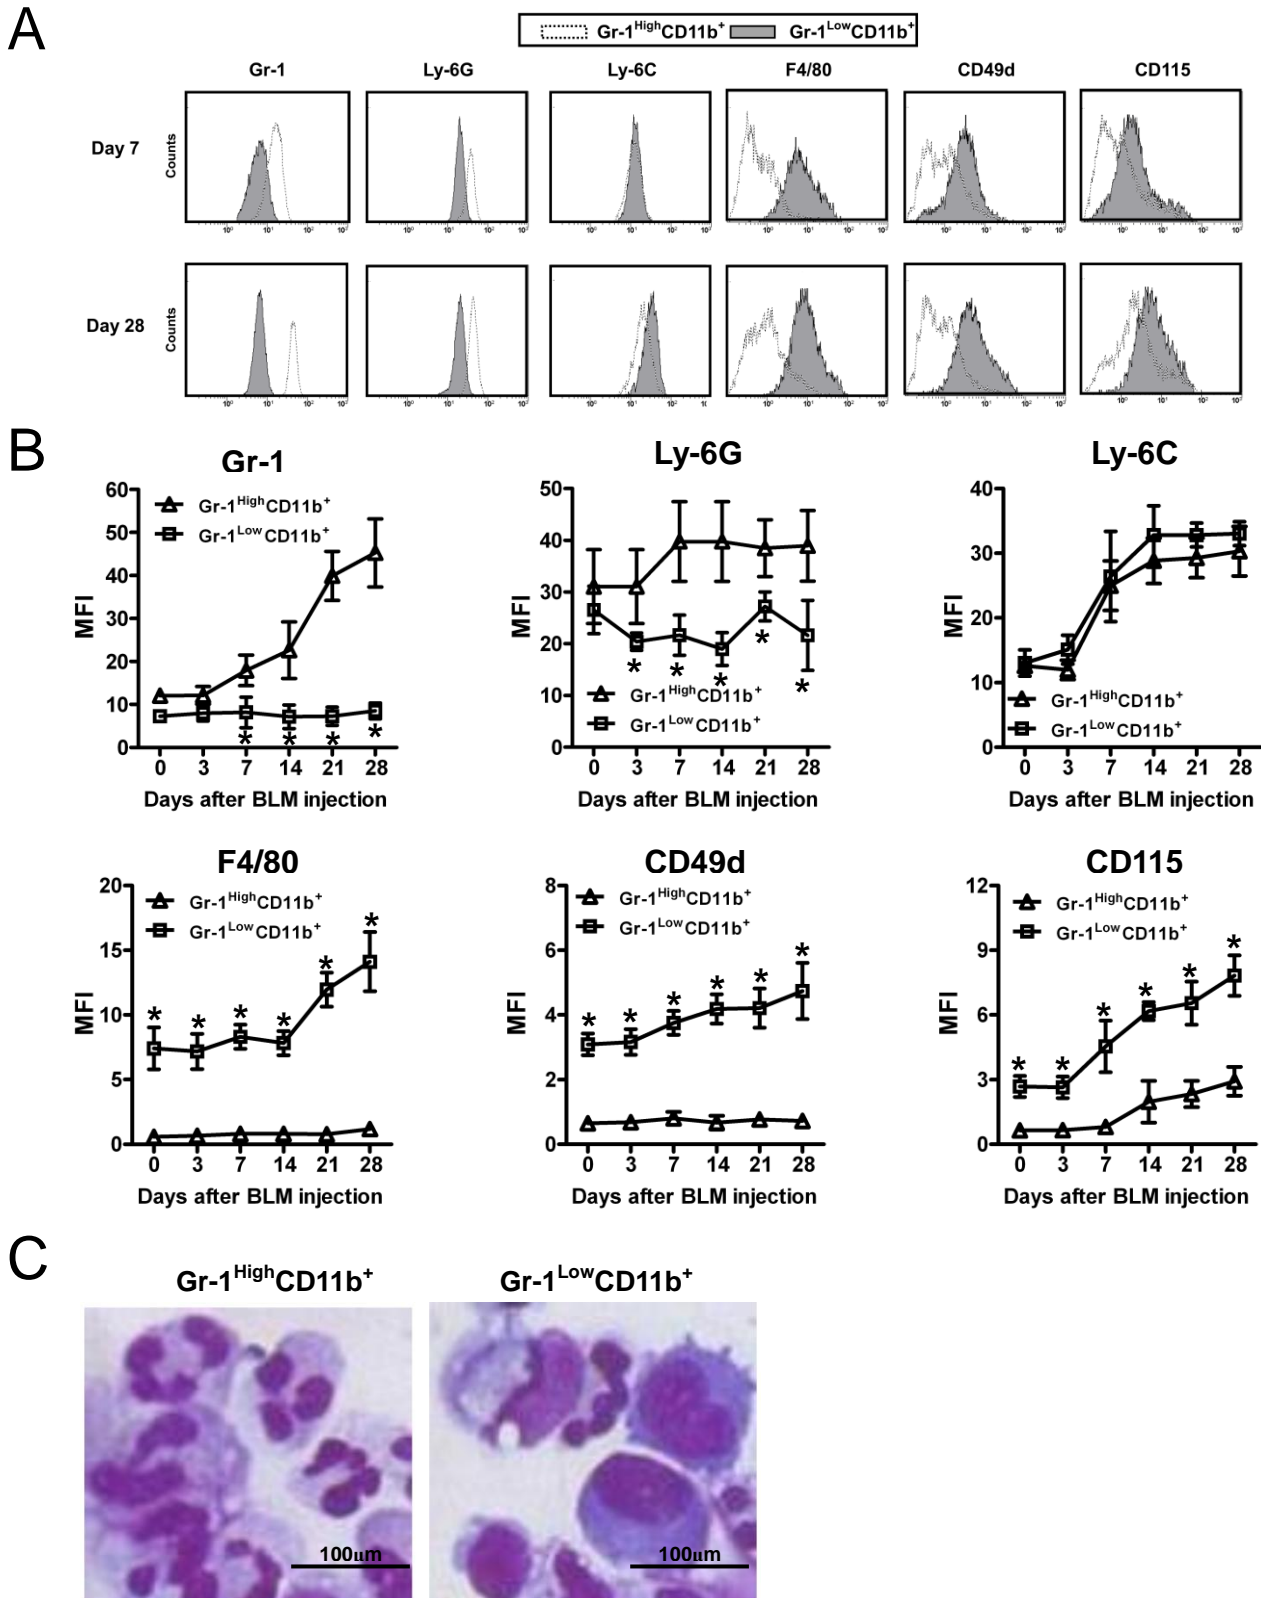

**Additional file 5: Figure S5.** Phenotype and morphology of Gr-1<sup>High</sup>CD11b<sup>+</sup> and Gr-1<sup>Low</sup>CD11b<sup>+</sup> cells. **After BMSC treatment in the BLM-treated mice, Gr-1<sup>High</sup>CD11b<sup>+</sup> and Gr-1<sup>Low</sup>CD11b<sup>+</sup> cells isolated from lungs of BMSC-treated mice (n=6) were analyzed for expression of various surface markers. a Representative flow cytometry data on day 7 and 28. b Variations of surface markers on Gr-1<sup>High</sup>CD11b<sup>+</sup> and Gr-1<sup>Low</sup>CD11b<sup>+</sup> cells in lungs of BMSC-treated mice. c Nuclear morphology of Gr-1<sup>High</sup>CD11b<sup>+</sup> and Gr-1<sup>Low</sup>CD11b<sup>+</sup> cells in lungs of BMSC-treated mice was demonstrated by Wright staining. \**P* < 0.01 as compared with “Gr-1<sup>High</sup>CD11b<sup>+</sup>” group. BLM, bleomycin; BMSC, bone marrow mesenchymal stem cells.**

MFI, mean fluorescence intensity.
