# Supplementary material for: Bone marrow mesenchymal stem cells tune the differentiation of myeloid-derived suppressor cells in bleomycin-induced lung injury
Source: PubMed Central journal article supplement (PMC6158827; doi:10.1186/s13287-018-0983-1), 2018-09-26
Supplement: 13287_2018_983_MOESM6_ESM.pdf [file 13287_2018_983_MOESM6_ESM.pdf]

Additional file 6: Figure S6

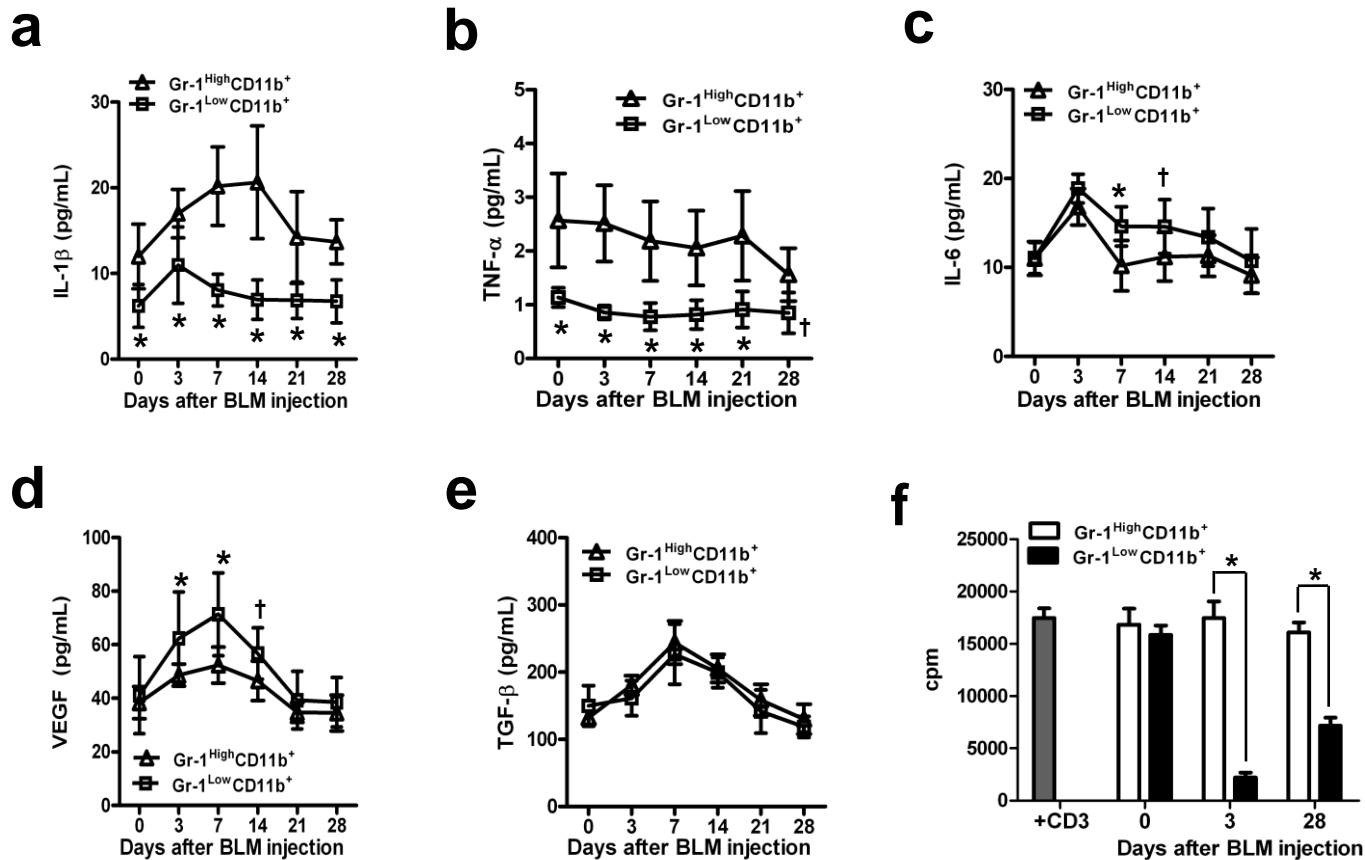

**Additional file 6: Figure S6.** Pro-inflammatory and Immunosuppressive property of Gr-1<sup>High</sup>CD11b<sup>+</sup> and Gr-1<sup>Low</sup>CD11b<sup>+</sup> cells. **After BMSC treatment in BLM-treated mice, Gr-1<sup>High</sup>CD11b<sup>+</sup> and Gr-1<sup>Low</sup>CD11b<sup>+</sup> cells were isolated from lungs of BMSC-treated mice (n=3) and cultured in triplicate (1 $\times$ 10<sup>5</sup> cells/well). a-e Twenty-four hours later, supernatants were collected and the levels of IL-1 $\beta$ , VEGF, TGF- $\beta$ , IL-6, and TNF- $\alpha$  were measured by ELISA. \* $P$  < 0.01 and †  $P$  < 0.05 as compared with “Gr-1<sup>High</sup>CD11b<sup>+</sup>” group. f CD3<sup>+</sup> cells (2 $\times$ 10<sup>5</sup> cells/well) isolated from spleens of naïve C57BL/6 mice were stimulated with CD3-specific antibodies (1 $\mu$ g/mL) in the presence of Gr-1<sup>High</sup>CD11b<sup>+</sup> or Gr-1<sup>Low</sup>CD11b<sup>+</sup> cells (1 $\times$ 10<sup>5</sup> cells/well) purified from lungs of BMSC-treated mice (n=3). T-cell proliferation was measured in triplicate by <sup>3</sup>H-thymidine incorporation. Data presented**

**are representative of two replicated experiments.** \* $P < 0.01$ . BLM, bleomycin; BMSC, bone marrow mesenchymal stem cells.
