# Supplementary material for: Bone marrow mesenchymal stem cells tune the differentiation of myeloid-derived suppressor cells in bleomycin-induced lung injury
Source: PubMed Central journal article supplement (PMC6158827; doi:10.1186/s13287-018-0983-1), 2018-09-26
Supplement: 13287_2018_983_MOESM7_ESM.pdf [file 13287_2018_983_MOESM7_ESM.pdf]

Additional file 7: Figure S7

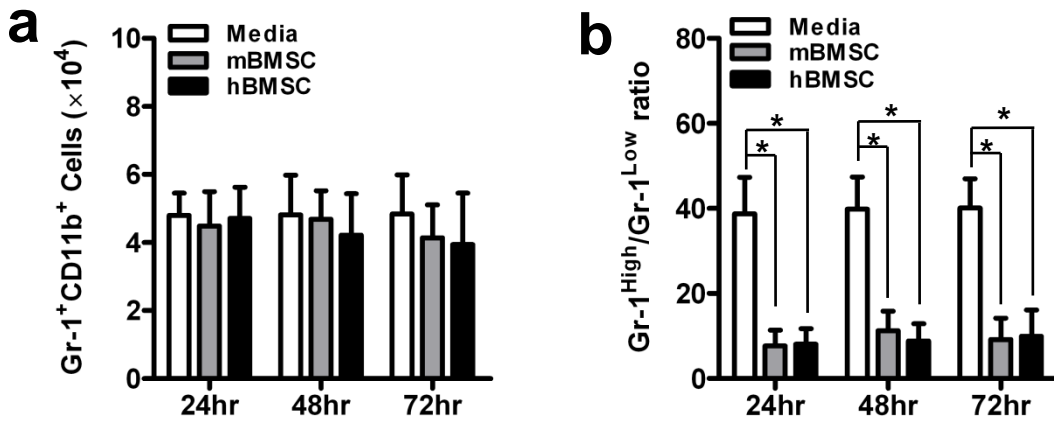

**Additional file 7: Figure S7. Human BMSC tune the differentiation of mouse MDSC in vitro. Gr-1<sup>+</sup>CD11b<sup>+</sup> cells ( $5 \times 10^4$ /well) isolated from naïve C57BL/6 mice were cultured in RPMI 1640 medium, alone or in the presence of mouse BMSC (mBMSC) or human BMSC (hBMSC) ( $1 \times 10^4$ /well). A total of 24, 48 and 72 hr after coculture, floating cells were collected and numerated. a The absolute number of Gr-1<sup>+</sup>CD11b<sup>+</sup> cells and (b) the variations of Gr-1<sup>High</sup>CD11b<sup>+</sup>/Gr-1<sup>Low</sup>CD11b<sup>+</sup> were calculated. \* $P < 0.01$ . BMSC, bone marrow mesenchymal stem cells; mAb, monoclonal antibody; W/O, without.**
